# Supplementary material for: Green synthesis of cubic CuO nanoparticles for biomedical applications and the photodegradation of methylene blue: RSM-BBD optimization of the reaction parameters and stability studies
Source: Royal Society of Chemistry journal article supplement (doi:10.1039/d5na01159k), 2026-04-28
Supplement: d5na01159k1.pdf [file d5na01159k1.pdf]

***Green synthesis of cubic CuO nanoparticles for biomedical applications and photodegradation of methylene blue: RSM-BBD optimization of reaction parameters, and stability studies***

Abu Bakar Siddique,<sup>a,\*</sup> Azhar Abbas,<sup>a,b</sup> Muhammad Sher,<sup>a</sup> Yasir Zaman,<sup>c</sup> Muhammad Fayyaz ur Rehman,<sup>a</sup> Umar Nishan,<sup>d</sup> Ibrahim A. Shaaban<sup>e</sup>

<sup>a</sup> *Institute of Chemistry, University of Sargodha, Sargodha 40100, Pakistan*

<sup>b</sup> *Department of Chemistry, Government Ambala Muslim College, Sargodha 40100, Pakistan*

<sup>c</sup> *Department of Physics, University of Sargodha, Sargodha 40100, Pakistan*

<sup>d</sup> *Department of Chemistry, Kohat University of Science and Technology, Kohat 26000 KP, Pakistan*

<sup>e</sup> *Department of Chemistry, Faculty of Science, Research Center for Advanced Materials Science (RCAMS), King Khalid University, P.O. Box 960, Abha, 61421, Saudi Arab*

\* *Corresponding authors: [abubakar.siddique@uos.edu.pk](mailto:abubakar.siddique@uos.edu.pk)*

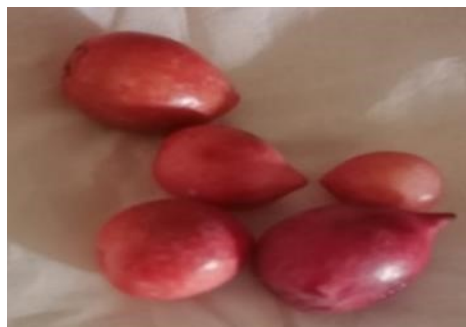

Figure S1. *C. macrocarpa* fruit

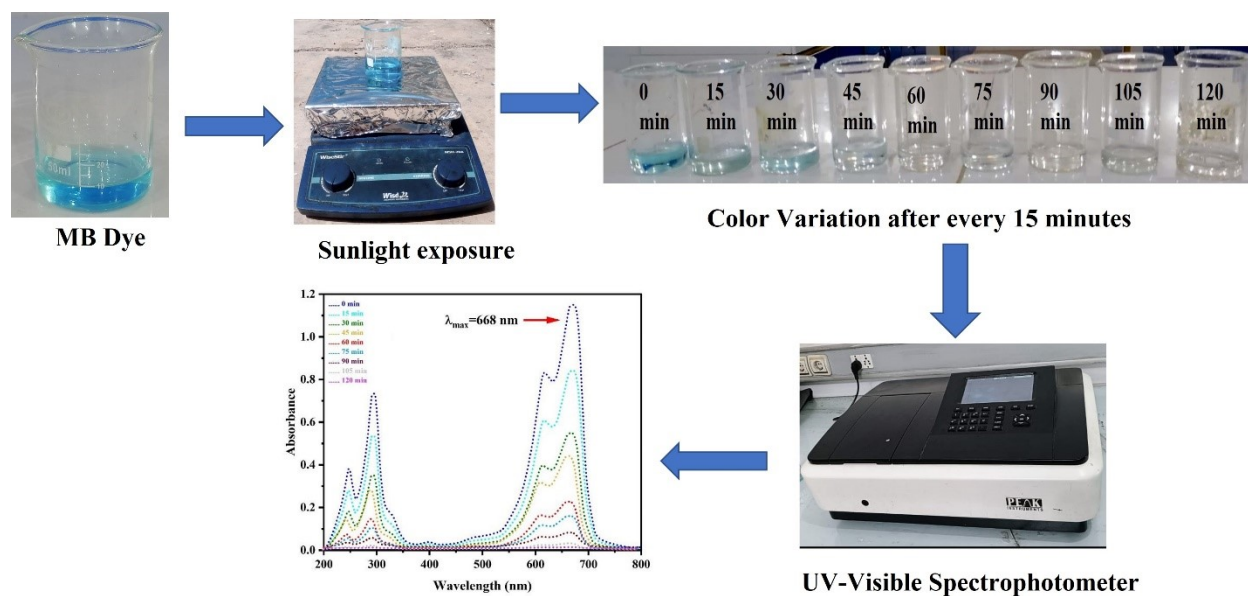

Figure S2. Scheme of photocatalytic activity analysis

**Table S1.** Details of variables and their coded levels

| Independent Variable (unit)               | Symbol | Coded levels |           | Mean |
|-------------------------------------------|--------|--------------|-----------|------|
|                                           |        | Low (-1)     | High (+1) |      |
| pH                                        | A      | 3            | 13        | 8    |
| Temperature (K)                           | B      | 298          | 358       | 328  |
| Initial Concentration of pollutants (ppm) | C      | 10           | 30        | 20   |
| Catalyst Dosage (mg)                      | D      | 10           | 50        | 30   |

**Table S2.** Phytochemical screening results for the CMFE extract.

| Metabolite            | Test                   | Observation          | Result   |
|-----------------------|------------------------|----------------------|----------|
| <b>Phenols</b>        | Lead acetate test      | White precipitates   | Positive |
| <b>Carbohydrates</b>  | Molisch test           | violet ring          | Positive |
| <b>Tannins</b>        | Braymer's Reagent test | greenish black color | Positive |
| <b>Flavonoids</b>     | Shinoda test           | pink scarlet color   | Positive |
| <b>Terpenoids</b>     | Salkowski test         | pink scarlet color   | Positive |
| <b>Saponins</b>       | Foam test              | Stable foam          | Positive |
| <b>Anthraquinones</b> | Borntrager test        | pink color           | Positive |

|                  |                      |             |          |
|------------------|----------------------|-------------|----------|
| <b>Alkaloids</b> | Draggendorff<br>test | Brown color | Positive |
|------------------|----------------------|-------------|----------|

---

### S1. Calculation of crystal parameters by XRD spectrum

The Debye-Scherrer relation (**Equation a**), the dislocation density ( $\delta$ ) formula (**Equation b**), the micro strain formula (**Equation c**) and degree of crystallinity (**Equation d**) were used to compute the crystal parameters, which include crystallite size, dislocation density, micro strain and degree of crystallinity, respectively [30]. The values of these parameters are depicted in **Table 2**.

$$D = \frac{k\lambda}{\beta \cos \theta} \quad (a)$$

$$\delta = \frac{1}{D^2} \quad (b)$$

$$\varepsilon = \frac{\beta}{4 \tan \theta} \quad (c)$$

$$\text{Degree of Crystallinity} = \frac{\text{Area of crystalline peaks}}{\text{Area of all peaks}} \times 100 \quad (d)$$

Where ‘D’ is the crystallite size, ‘K’ is Scherer constant, ‘ $\lambda$ ’ wavelength of X-rays, ‘ $\theta$ ’ is the diffraction angle and ‘ $\beta$ ’ refers to the correspond to the FWHM.

**Table S3.** Fit summary of model by software for MB degradation

| Source | Sequential p-value | Lack of Fit p-value | Adjusted R <sup>2</sup> | Remarks |
|--------|--------------------|---------------------|-------------------------|---------|
| Linear | 0.4544             | 0.0008              | -0.0077                 |         |
| 2FI    | 0.9986             | 0.0004              | -0.3148                 |         |

|                  |                    |               |               |                  |
|------------------|--------------------|---------------|---------------|------------------|
| <b>Quadratic</b> | <b>&lt; 0.0001</b> | <b>0.8471</b> | <b>0.9856</b> | <b>Suggested</b> |
| Cubic            | 0.7013             | 0.7649        | 0.9824        | <b>Aliased</b>   |

---

## S2. Butler-Ginley Equations

$$E_{CB} = X - E_C - 0.5E_g \quad (e)$$

$$E_{VB} = E_{CB} + E_g \quad (f)$$

Here,  $X$ ,  $E_C$  and  $E_g$  are the Mulliken's electronegativity, the energy of free electrons (4.5 eV) and energy bandgap.

## S3. Proposed mechanism of MB degradation

The suitable mechanism of catalytic degradation of MB is represented by **Equations (g-o)**.

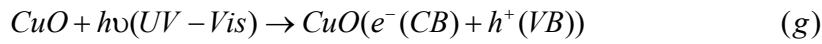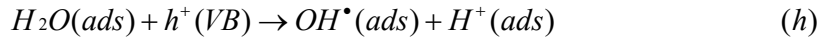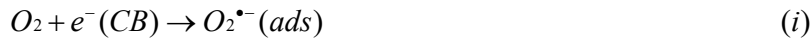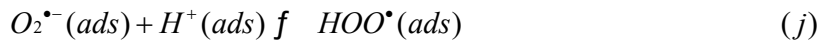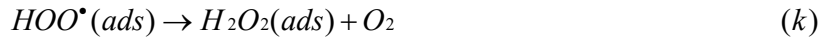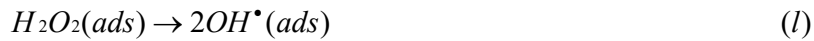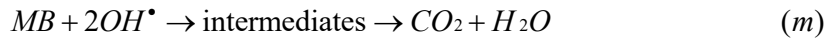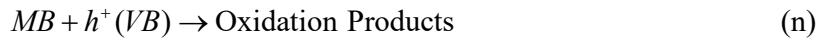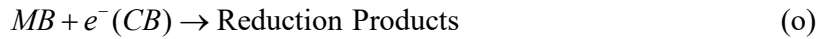

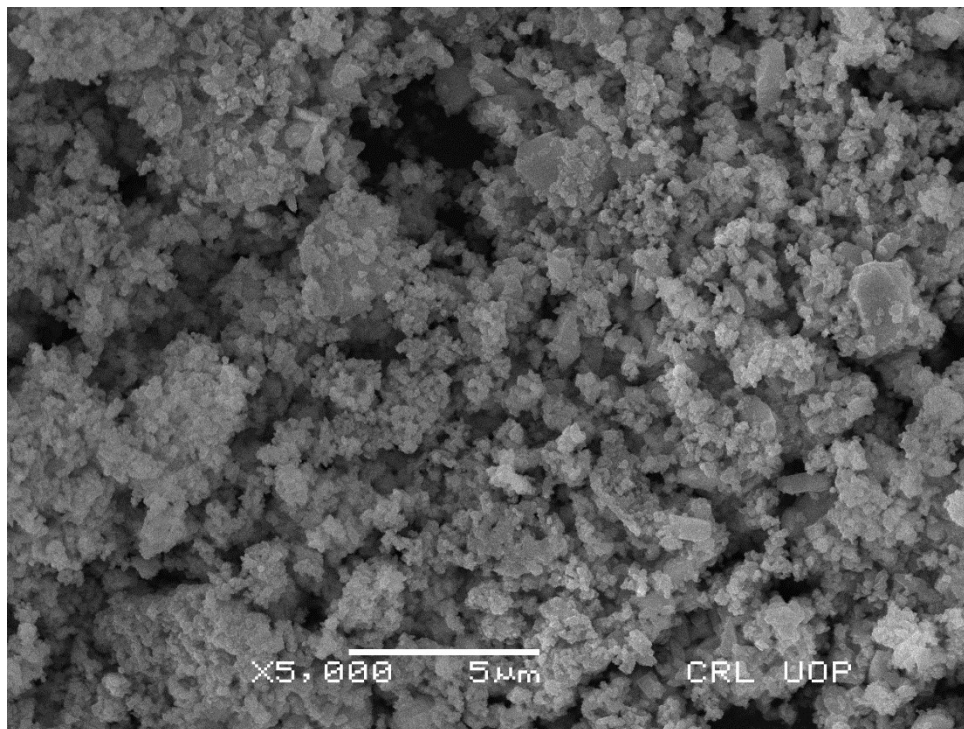

**Figure S3.** SEM image of CMFE@CuO NPs

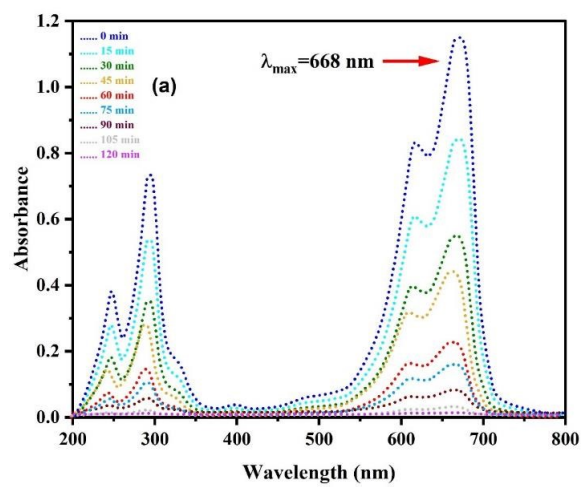

**Figure S4.** UV-Vis spectra of MB at different time intervals

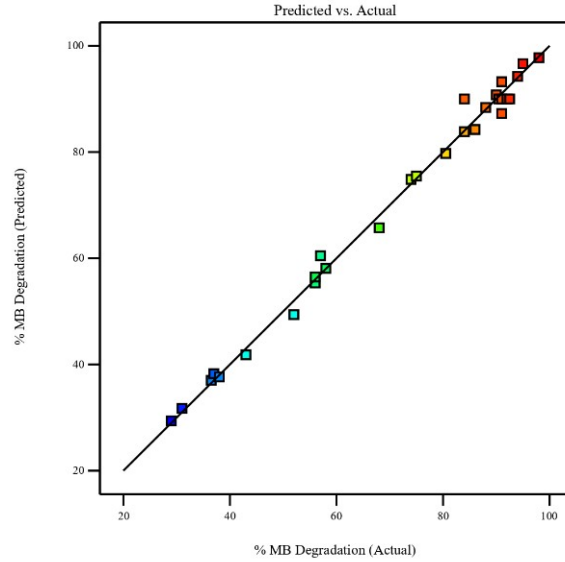

**Figure S5.** Actual values vs predicted values of MB dye degradation

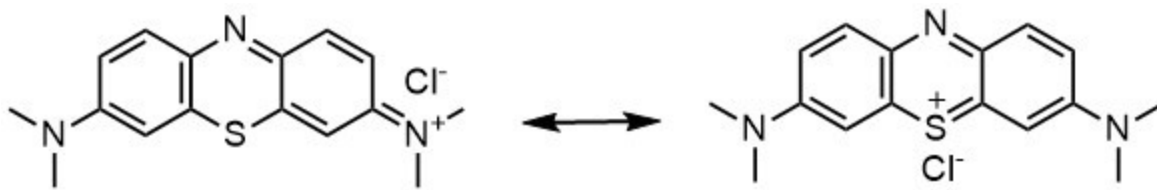

**Figure S6.** Different resonance forms of MB dye

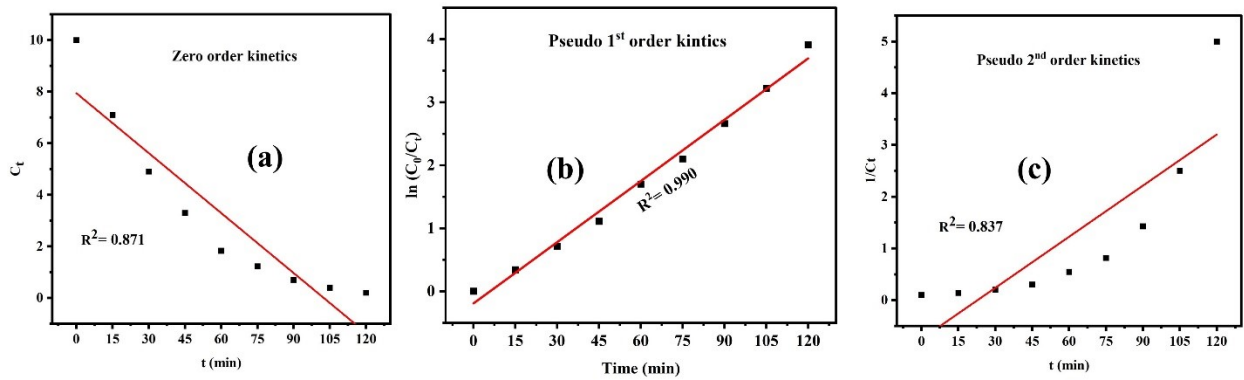

**Figure S7.** Data fitting of photodegradation of MB on CMFE@CuO NPs (a) zero-order kinetics, (b) Pseudo 1<sup>st</sup> order kinetics, and (c) Pseudo 2<sup>nd</sup> order kinetics

**Table S4.** Comparison table of different catalysts for photodegradation of MB

| Catalyst                                                               | Degradation (%) | Rate constant (k) (min <sup>-1</sup> ) | Reaction time (min) | Light source                     | Reference    |
|------------------------------------------------------------------------|-----------------|----------------------------------------|---------------------|----------------------------------|--------------|
| Polythiophene doped ZnO                                                | 80              | 0.0156                                 | 180                 | 250 W high-pressure mercury lamp | 1            |
| CuO NPs                                                                | 97.5            | 0.0255                                 | 120                 | UV light                         | 2            |
| Cu NPs                                                                 | 90              | 0.0172                                 | 120                 | sunlight                         | 3            |
| MgO NPs                                                                | 90              | 0.01544                                | 120                 | Xenon lamp (> 400 nm)            | 4            |
| CuO/CuS/MnO <sub>2</sub> NCs                                           | 98              | 0.022                                  | 160                 | Visible light                    | 5            |
| Zn <sub>0.5</sub> Cu <sub>0.5</sub> Fe <sub>2</sub> O <sub>4</sub> NPs | 94              | 0.026                                  | 135                 | UV light                         | 6            |
| GO-LaFeO <sub>3</sub> NPs                                              | 91.2            | 0.0137                                 | 150                 | Visible light                    | 7            |
| CMFE@CuO NPs                                                           | 99.9            | 0.044                                  | 120                 | sunlight                         | Current work |

## References

1. M. Faisal, F. A. Harraz, M. Jalalah, M. Alsaiani, S. Al-Sayari and M. Al-Assiri, *Materials Today Communications*, 2020, **24**, 101048.
2. A. I. Khedr and M. H. Ali, *Scientific Reports*, 2024, **14**, 29156.
3. S. C. Mali, A. Dhaka, C. K. Githala and R. Trivedi, *Biotechnology Reports*, 2020, **27**, e00518.
4. A. Ahmad, M. Khan, S. Khan, R. Luque, T. Almutairi and A. Karami, *International Journal of Environmental Science and Technology*, 2023, **20**, 1451-1462.
5. M. Abdullah, P. John, M. N. Ashiq, S. Manzoor, M. I. Ghori, M. U. Nisa, A. G. Abid, K. Y. Butt and S. Ahmed, *Nanotechnology for Environmental Engineering*, 2023, **8**, 63-73.
6. O. H. Abuzeyad, A. M. El-Khawaga, H. Tantawy, M. Gobara and M. A. Elsayed, *Journal of Inorganic and Organometallic Polymers and Materials*, 2024, **34**, 2705-2715.
7. M. A. Mutalib, F. Aziz, N. A. Jamaludin, N. Yahya, A. F. Ismail, M. A. Mohamed, M. Z. M. Yusop, W. N. W. Salleh, J. Jaafar and N. Yusof, *Korean Journal of Chemical Engineering*, 2018, **35**, 548-556.
